# Supplementary material for: Proso Millet (Panicum miliaceum L.) as Alternative Source of Starch and Phenolic Compounds: A Study on Twenty-Five Worldwide Accessions
Source: MDPI journal article supplement (doi:10.3390/molecules28176339), 2023-08-30
Supplement: s1 [file s1]

## SUPPLEMENTARY MATERIAL

**Table S1.** Identified compounds in millet samples according to UV–Vis (sh, shoulder) and mass spectra.

| Phenolic compounds | Rt   | $\lambda$ max | MW  | [M-H] <sup>-</sup> | Identified compounds            |
|--------------------|------|---------------|-----|--------------------|---------------------------------|
| <b>F1</b>          | 11.6 | 270,349       | 448 | 447                | Luteolin-7- <i>O</i> -glucoside |
| <b>F2</b>          | 13.3 | 268,336       | 432 | 431                | Vitexin                         |
| <b>C1</b>          | 15.1 | 287sh,323     | 194 | 193                | Isoferulic acid                 |
| <b>C2</b>          | 18.8 | 290sh,310     | 178 | 177                | Methyl hydroxycinnamate         |
| <b>C3</b>          | 19.7 | 300sh,324     | 208 | 207                | Methyl ferulate                 |
| <b>C4</b>          | 24.0 | 288sh,324     | 240 | 239                | Cinnamic der.                   |
| <b>C5</b>          | 30.9 | 306sh,324     | 414 | 413                | Cinnamic der.                   |

*Rt, retention time*

**Table S2.** Independent sample T test conducted on white and coloured millet species. \* Represent  $p$  value  $< 0.05$ . G1, mean value for coloured millet species; G2, mean value for white millet species;  $df$ , degree of freedom; A, amylose; AP, amylopectin; RS, resistant starch; DS, digestible starch; TC, total cinnamic acid content; TF, total flavonoid content; ARA, antiradical activity.

|                      | G1: coloured | G2: white | t-test | df | p-value |   |
|----------------------|--------------|-----------|--------|----|---------|---|
| A                    | 25.10        | 32.62     | -2.12  | 23 | 0.045   | * |
| AP                   | 74.90        | 67.05     | 2.22   | 23 | 0.036   | * |
| RS                   | 17.50        | 19.63     | -1.49  | 9  | 0.170   |   |
| DS                   | 27.71        | 31.35     | -1.59  | 13 | 0.138   |   |
| TC                   | 1.18         | 1.02      | 2.06   | 8  | 0.072   |   |
| TF                   | 0.02         | 0.00      | 1.73   | 21 | 0.098   |   |
| ARA                  | 55.44        | 41.69     | 4.92   | 21 | 0.000   | * |
| Kcal                 | 367.50       | 369.29    | -0.34  | 11 | 0.742   |   |
| Kj                   | 1556.56      | 1563.29   | -0.32  | 11 | 0.755   |   |
| Ash                  | 4.37         | 3.59      | 2.26   | 21 | 0.035   | * |
| Moisture             | 9.64         | 10.10     | -2.11  | 13 | 0.056   |   |
| Proteins             | 11.37        | 12.36     | -1.65  | 13 | 0.122   |   |
| Carbohydrates        | 70.03        | 69.14     | 0.87   | 16 | 0.383   |   |
| Sugars               | 1.17         | 1.40      | -1.79  | 15 | 0.094   |   |
| Fats                 | 4.65         | 4.81      | -0.17  | 9  | 0.872   |   |
| Saturated fats       | 0.48         | 0.49      | -0.08  | 9  | 0.938   |   |
| Sodium               | 3.84         | 3.66      | 0.14   | 12 | 0.891   |   |
| Fibre                | 24.78        | 18.33     | 3.17   | 13 | 0.007   | * |
| Number of leaves     | 6.41         | 7.21      | -2.18  | 23 | 0.040   |   |
| Weight of 1000 seeds | 5.57         | 5.78      | -0.58  | 9  | 0.578   |   |
| Plant height         | 70.52        | 66.44     | 0.77   | 15 | 0.452   |   |
| Number of tillers    | 4.13         | 3.94      | 0.46   | 10 | 0.654   |   |
| Yield per plant      | 8.85         | 8.64      | 0.17   | 11 | 0.872   |   |
| Harvest yield        | 1685.32      | 1841.94   | -0.59  | 10 | 0.569   |   |
| Dry biomass          | 5619.54      | 6259.21   | -0.77  | 10 | 0.462   |   |

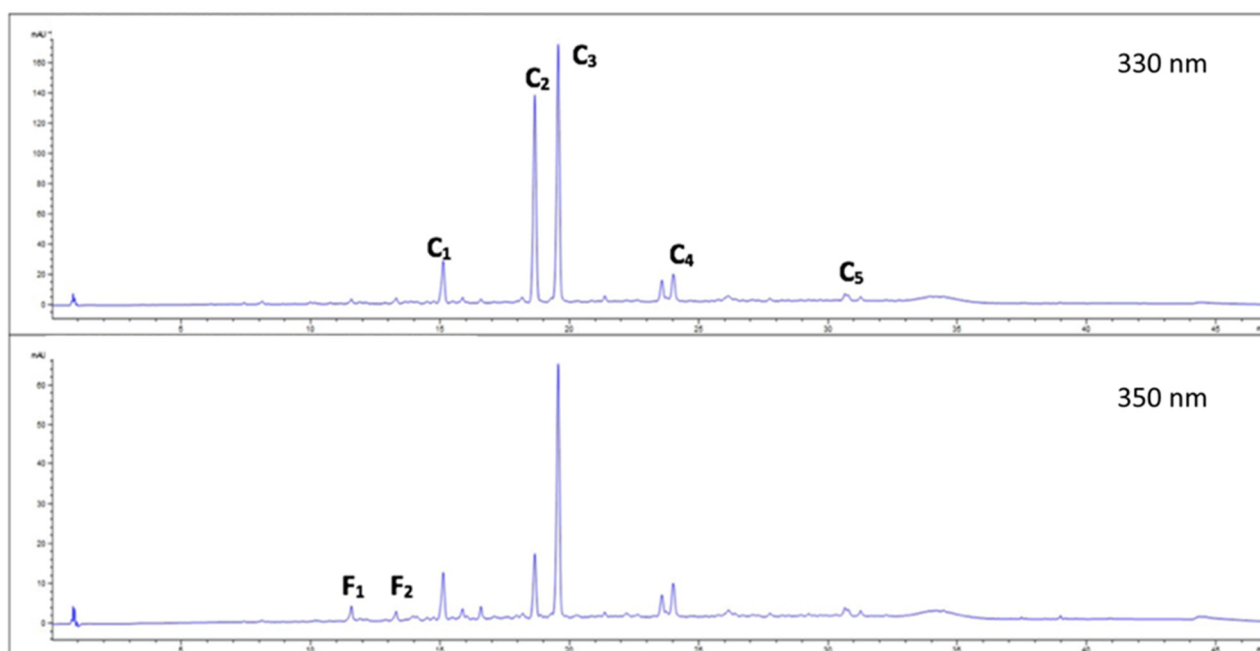

**Figure S1.** HPLC profiles at 330 and 350 nm of a millet extract. The identified phenolic compounds are listed in Table S1.

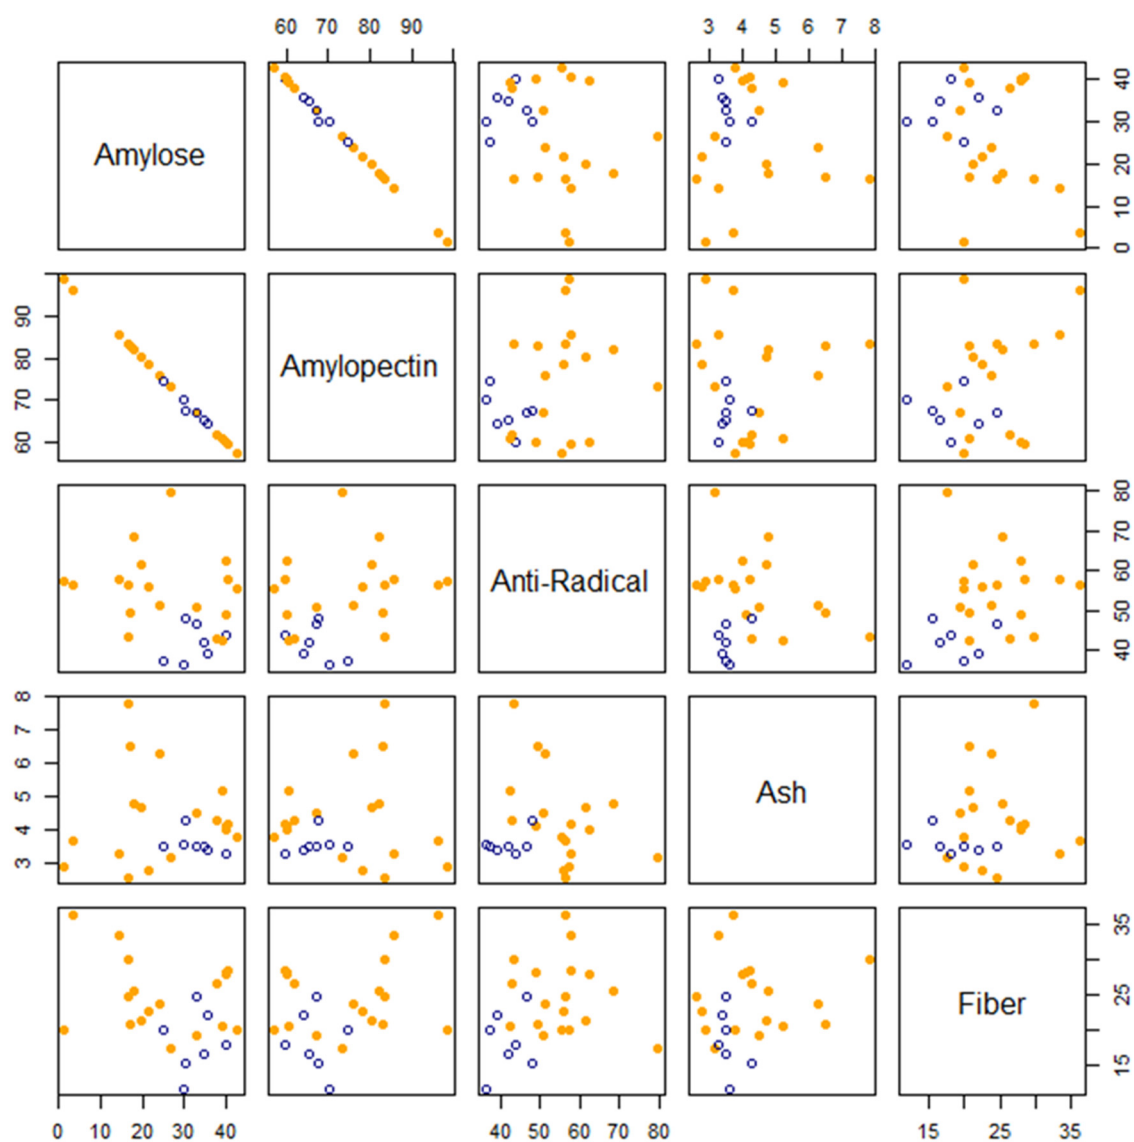

**Figure S2.** 2D scatter plot matrix of amylose, amylopectin, fibre and ash contents and antiradical activity measured on the 25 millet samples. Coloured samples are shown in orange; the white varieties are represented with blue circled white bullet.
